# Supplementary material for: Human lung and monocyte-derived macrophages differ with regard to the effects of β2-adrenoceptor agonists on cytokine release
Source: Springer Nature journal article supplement (doi:10.1186/s12931-017-0613-y), 2017-06-21

**Additional file 1 (.pdf):**

- LPS concentration-response data for MDMs (empty bars) and LMs (filled bars) (n=5).

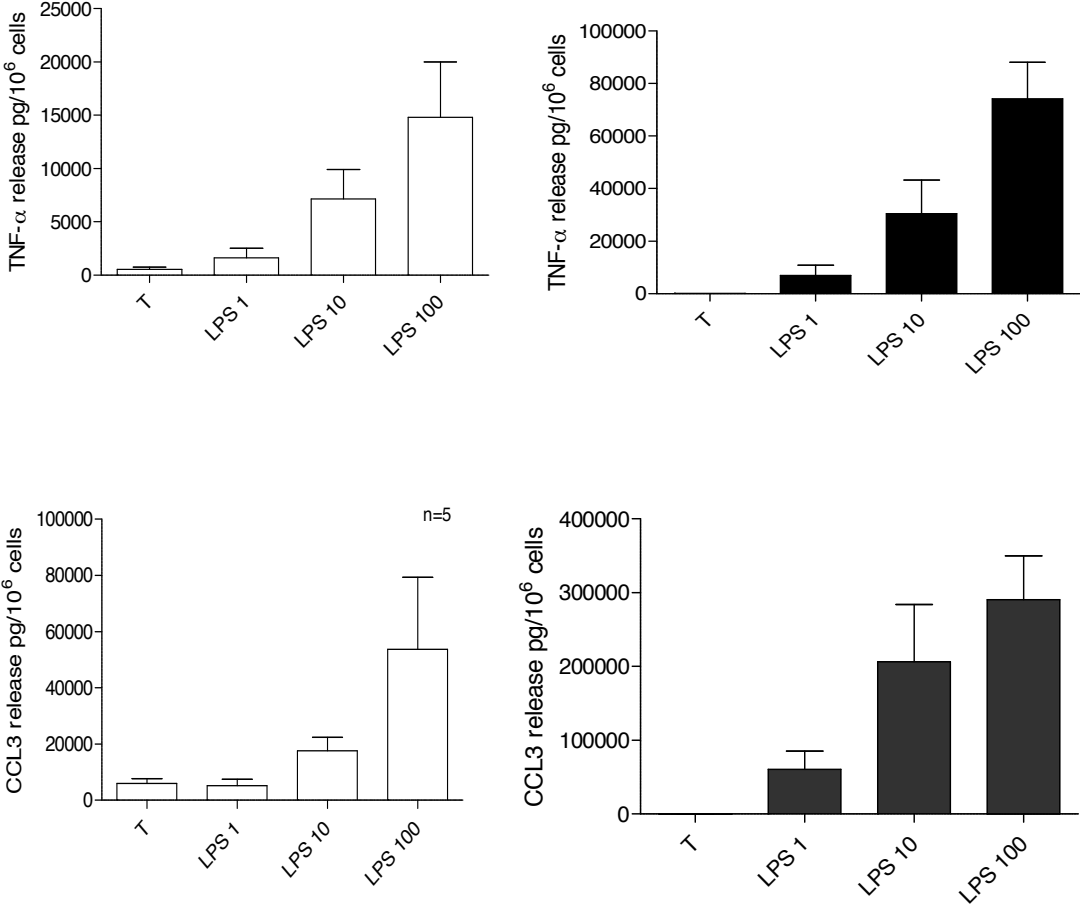

- Time-course experiments in LMs with LPS (n = 4).

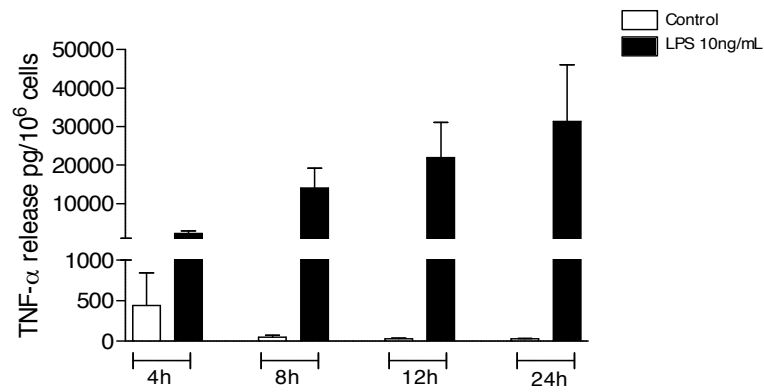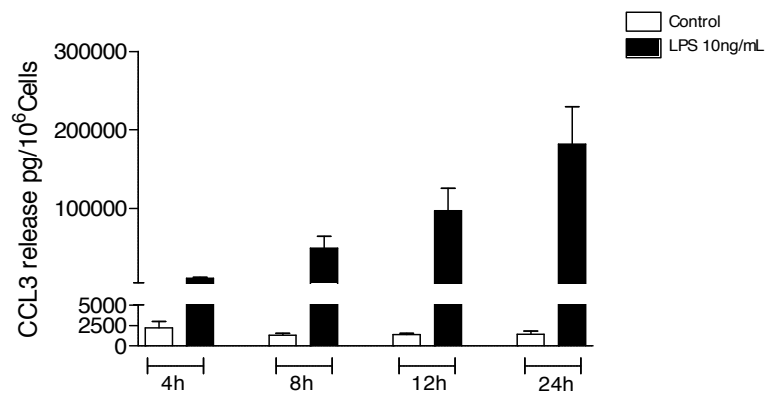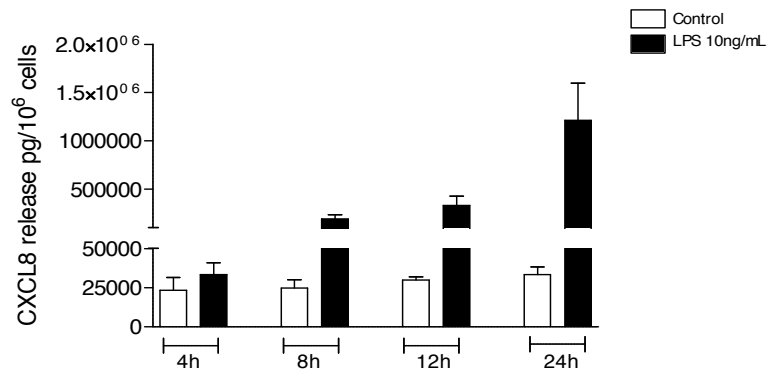

Supplement: MOESM1 [file 12461578]
