# Supplementary material for: Human lung and monocyte-derived macrophages differ with regard to the effects of β2-adrenoceptor agonists on cytokine release
Source: Springer Nature journal article supplement (doi:10.1186/s12931-017-0613-y), 2017-06-21

**Additional file 2 (.pdf):**

Effect of salbutamol (1  $\mu$ M) on LPS (10 ng/ml)-induced cytokine production by MDMs (empty bars) and LMs (filled bars).

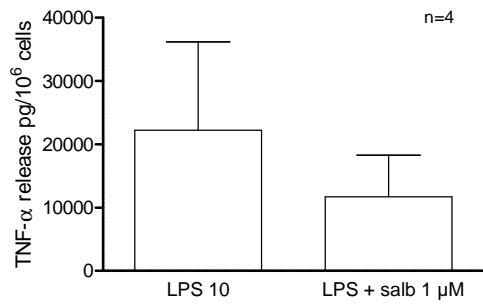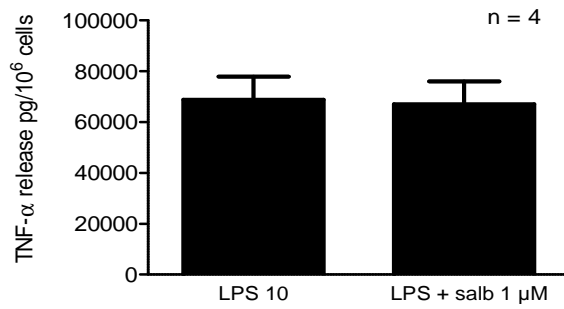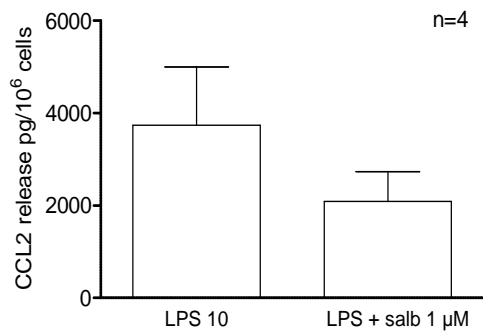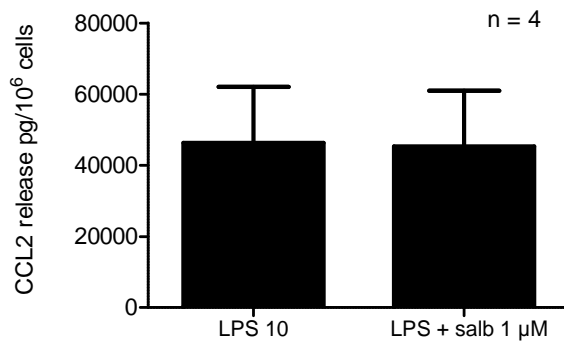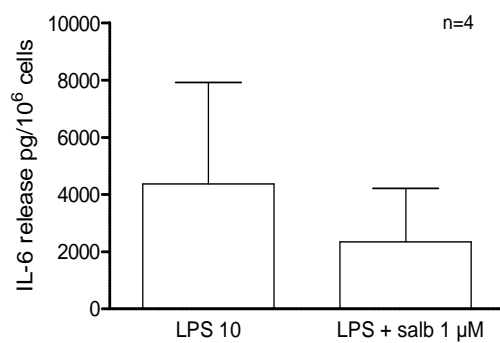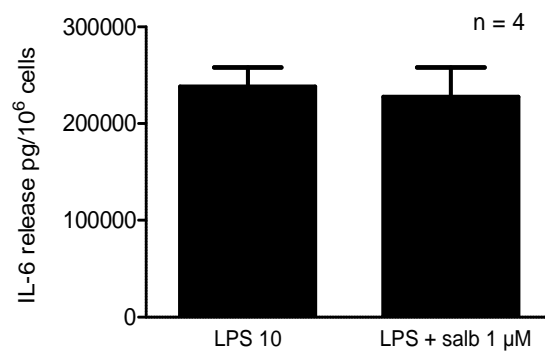

Supplement: MOESM2 [file 12461578]
